# Supplementary material
Source: Springer Nature journal article supplement (https://www.springermedizin.de/resource/supplementary/12936_2009_1006_MOESM1_ESM.pdf/9548762)

antibody measured in arbitrary units

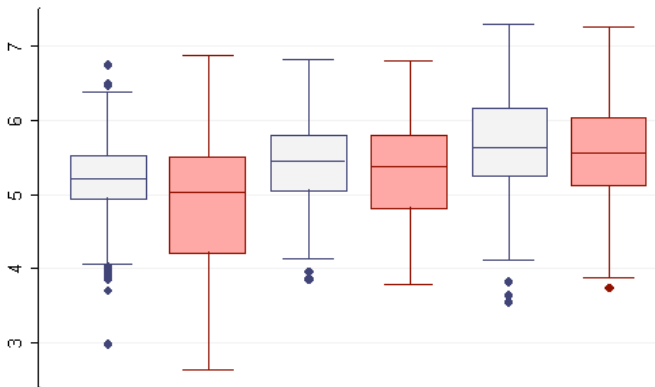

AMA-1

P=0.02

MSP2-3D7

P=0.68

MSP2-FC27

p=0.14

□ HIVneg (N=224)

■ HIVpos (N=115)

Supplement: MOESM1 [file 9548762]
